# Supplementary material for: Assessment of agglomeration, co-sedimentation and trophic transfer of titanium dioxide nanoparticles in a laboratory-scale predator-prey model system
Source: PubMed Central journal article supplement (PMC4987863; doi:10.1038/srep31422), 2016-08-17
Supplement: srep31422-s1.pdf [file srep31422-s1.pdf]

1 **Supplementary Information**

2 **Assessment of agglomeration, co-sedimentation and trophic transfer of**  
3 **titanium dioxide nanoparticles in a laboratory-scale predator-prey model**  
4 **system**

5  
6 Govind Sharan Gupta<sup>1,2</sup>, Ashutosh Kumar<sup>1</sup>, Rishi Shanker<sup>1\*</sup>, Alok Dhawan<sup>2\*</sup>

7  
8 **Author's Affiliations:**

9 <sup>1</sup>Division of Biological & Life Sciences, School of Arts & Sciences (Formally, Institute  
10 of Life Sciences), Ahmedabad University, University Road, Navrangpura,  
11 Ahmedabad - 380009, Gujarat (INDIA)

12 <sup>2</sup>Nanotherapeutics & Nanomaterial Toxicology Group, CSIR-Indian Institute of  
13 Toxicology Research (CSIR-IITR), Vishvigyan Bhawan, 31-M.G. Marg, Lucknow -  
14 226001, U.P. (INDIA)

15 **\* Corresponding Authors**

16 **Professor Alok Dhawan**

17 Nanotherapeutics & Nanomaterial Toxicology Group  
18 CSIR-Indian Institute of Toxicology Research (CSIR-IITR)  
19 Vishvigyan Bhawan, 31-M.G. Marg, Lucknow - 226001, U.P. (INDIA)  
20 E-mail: [alokdhawan@iitr.res.in](mailto:alokdhawan@iitr.res.in) ; [alokdhawan@yahoo.com](mailto:alokdhawan@yahoo.com)  
21 Phone: +91-522-2621856  
22 Fax: +91-522-2628227

23  
24 **Professor Rishi Shanker**

25 Division of Biological & Life Sciences  
26 School of Arts & Sciences  
27 (Formally, Institute of Life Sciences)  
28 Ahmedabad University  
29 University Road, Navrangpura, Ahmedabad - 380009, Gujarat, (INDIA)  
30 E-mail: [rishi.shanker@ahduni.edu.in](mailto:rishi.shanker@ahduni.edu.in), [rishishanker@gmail.com](mailto:rishishanker@gmail.com)  
31 Phone: +91-79-26302414  
32 Fax: +91-79-26302419

## 33 **Methods Section**

34 **1. Model organisms:** *Paramecium caudatum* was used as a predator, and  
35 *Escherichia coli* was used as a prey species to study the fate of ENMs in a  
36 laboratory-based simple aquatic system allowing the assessment of predator-prey-  
37 based interactions in an aquatic environment,. It has been shown that fresh water  
38 bodies contain  $\sim 10^6$  cells/ml of bacteria and 100-10,000 cells/ml of ciliated  
39 protozoans.<sup>1-2</sup> *Paramecium caudatum* is a fresh water single-celled ciliated  
40 protozoan that feeds on bacteria and controls populations of harmful bacterial  
41 species. The food web connects prokaryotes to single-celled invertebrates (such  
42 as *Paramecium*) and multicellular eukaryotes such as zebrafish (embryos  
43 efficiently feed on *Paramecium*). *Escherichia coli* a model bacterium that is  
44 extensively used in toxicity assessments of ENMs because it rapidly divides and  
45 can be easily cultured. This allows for high-throughput screening of nanomaterial  
46 interactions.

47 **2. *E. coli* and *Paramecium* culture:** *E. coli* were cultured in Luria Bertani (LB) broth  
48 (HiMedia Pvt. Ltd., Mumbai, India) at 37 °C in an environmental shaker incubator  
49 overnight. The organisms were sub-cultured and grown to mid-exponential phase  
50 (OD = 0.4). The *E. coli* culture was then pelleted at 3000  $\times g$  for 8 min. The pellet  
51 was washed thrice with Dryl's buffer. Finally, the pellet was re-suspended in Dryl's  
52 buffer and incubated at 22 °C for the duration of the experiment.

53 *Paramecium* cells were cultured in a protozoan pellet medium. A protozoan pellet  
54 (0.55 g) was dissolved in 1 L of deionised water. The medium was autoclaved,  
55 cooled, inoculated with adequate *E. coli* and cultured at room temperature for 12  
56 h. The *Paramecium* culture ( $\sim 1000$  cells in 50 ml) was added to a 100-ml plastic  
57 container and maintained at 22 °C in a BOD incubator (Model LBI-500M, Daihan

58 Labtech, India) containing boiled wheat seed to facilitate the slow release of  
59 nutrients. The density of the culture was verified using a stereo-zoom-microscope  
60 (Leica Wild M3, Heerbrugg, Switzerland), and sub-culturing was performed once  
61 per week.

62 For experiments, cultures were centrifuged at 130 xg for 3 min at 4 °C and  
63 subsequently filtered through a 20-µm nylon mesh filter (Millipore, India).  
64 *Paramecium* cells were starved for 24 h in sterile Dryl's buffer at 22 °C in a BOD  
65 incubator to clear the food vacuoles.

### 66 **Counting of *Paramecium* and *E. coli* cells**

67 ***E. coli*:** Bacterial cell counting was performed in a haemocytometer under an  
68 optical microscope at 1000x magnification using immersion oil. The culture was  
69 fixed with 4% glutaraldehyde immediately after the sample was withdrawn to stop  
70 *Paramecium* feeding on *E. coli*. Then, *E. coli* cells were stained with crystal violet  
71 dye (HiMedia, Mumbai India) and incubated for 10 min at 37 °C before counting.  
72 Crystal violet staining confers a purple colour on rod-shaped *E. coli* cells. Ten  
73 microlitres of culture was loaded into the haemocytometer, and purple-coloured  
74 rod-shaped bacteria were counted according to the manufacturer's instructions.  
75 The number of bacterial cells/ml was calculated by multiplying the obtained value  
76 by 10000.

77 ***Paramecium*:** *Paramecium* cells were counted under a stereo-zoom microscope  
78 by fixing 20 µL of sample with 0.01% neutral formalin. Cell counting was performed  
79 in triplicate, and the average was taken to calculate the number of cells per ml.

80

81 **3. Preparation of the laboratory-scale microcosm:** The microcosm was  
82 established in a 50-ml centrifuge tube containing 40 ml of Dryl's buffer inoculated

83 with *E. coli* (OD<sub>600</sub> 0.4, 10<sup>5</sup>-10<sup>6</sup> cells/ml), *Paramecium* (600-800 cells/ml) and nTiO<sub>2</sub>  
84 (5, 25, 50 and 100 µg/ml) as depicted in Figure S1.

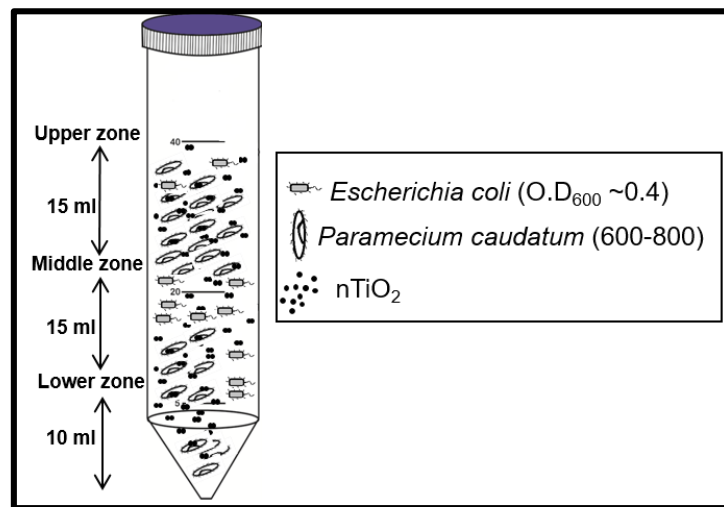

85

86 **Figure S1:** The design of a laboratory-scale aquatic microcosm.

#### 87 4. Sample preparation for microscopy

88 **4.1. Dark field and bright field microscopy:** Drops of suspension containing  
89 nTiO<sub>2</sub> and *E. coli*-incubated nTiO<sub>2</sub> were placed on glass slides, visualised and  
90 imaged directly under the microscope (Model DMLB Leica, Wetzlar, Germany)  
91 without fixation. All images were acquired at 100x magnification. *Paramecium*  
92 samples for dark and bright field microscopy were prepared on glass cavity slides,  
93 and 0.01% neutral formalin was used as a fixative. A few drops of fixative were  
94 added before the samples were imaged under the microscope (Model DMLB  
95 Leica, Wetzlar, Germany). All images were captured at 200x magnification.

96 **4.2. Scanning electron microscopy for hetero-agglomeration and co-**  
97 **sedimentation analysis:** The samples for SEM analysis were prepared on small  
98 pieces of glass slides that could fit on an SEM stub. Drops of samples were placed  
99 on slides, which were then dried at room temperature for 24 h. The samples were  
100 sputter-coated with gold, and images were captured and analysed for titanium (Ti)

101 by point analysis using a scanning electron microscope equipped with an EDS  
102 (Models Quanta™ FEG 450, FEI, Tokyo Japan and JSM-6010LA, Jeol Ltd., Tokyo,  
103 Japan).

104 **4.3. Transmission electron microscopy:** *Paramecium* samples were prepared  
105 by pre-fixing the cells with a gradient of glutaraldehyde (1.25-2.5%) for 30 minutes.  
106 The samples were then post-fixed with 1% osmium tetroxide for 2 h. Samples were  
107 washed with 0.1 M sodium cacodylate buffer. Furthermore, dehydration was  
108 performed with an acetone gradient (15–100%). Samples were infiltrated with  
109 araldite resin overnight at room temperature and finally embedded in pure resin.  
110 The blocks were cured at 60 °C for 72 h. After curing, ultrathin sections (60-80 nm)  
111 were prepared using an ultra-microtome. The sections were placed on 200-mesh,  
112 Formvar-coated copper grids, and images were acquired without staining using  
113 TEM (Tecnai™ G2 Spirit FEI, The Netherlands)

114 **5. Sample preparation for flow cytometry:** The entire contents of each well  
115 containing *Paramecium* cells were centrifuged at 130 xg for 3 min at 4 °C. The  
116 samples were then re-suspended in 500 µL of Deryl's buffer. At least 1000 events  
117 per sample were acquired for data analysis. All samples were acquired on a  
118 FACSCanto II (BD Biosciences, New Delhi, India), and data were analysed with  
119 FACSDiva 6.12 software (BD Biosciences, India). The flow cytometry threshold  
120 value for *Paramecium* analysis was set at 5000 for the forward scattering (FSC)  
121 intensity. At this threshold value, neither bacteria nor nTiO<sub>2</sub> particles were  
122 detected, but the events were easily detected for the *Paramecium* population.  
123 The data were analysed by comparing the side scattering intensities (SSC) of  
124 control and treated *Paramecium* cells. Quality control of the equipment was  
125 ensured by performing regular checks with CST beads and CaliBRITE beads (BD

126 Biosciences, India). Amplifier settings for forward scattering (FSC) and side  
127 scattering (SSC) intensity were used at linear and logarithmic scales, respectively.

## 128 Results Section

### 129 1. Characterisation of NPs:

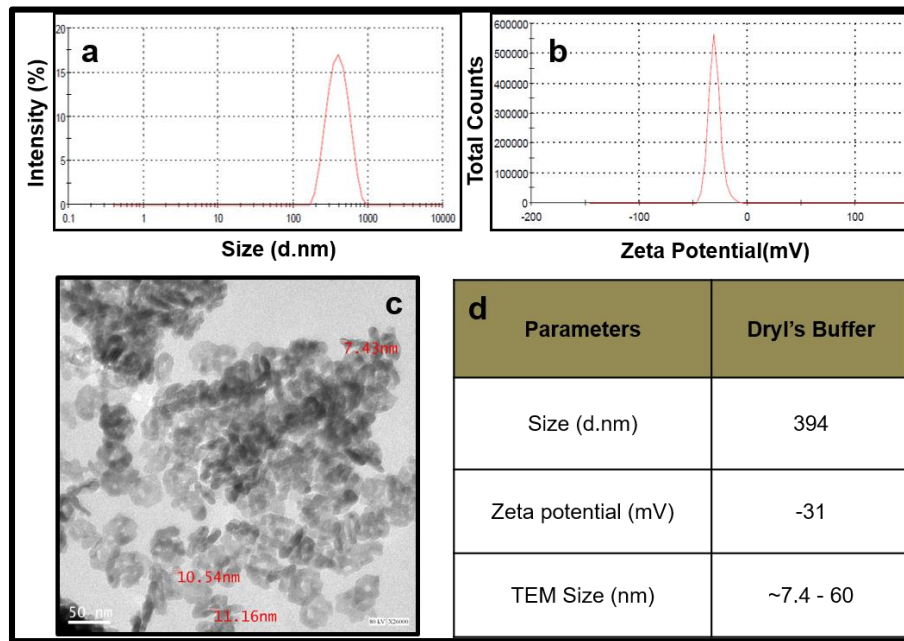

130

131 **Figure S2:** Characterisation of nTiO<sub>2</sub>. (a-b) Hydrodynamic size and zeta potential; (c)  
132 transmission electron microscopic observation showing the heterogeneous  
133 distribution of nTiO<sub>2</sub> at sizes ranging from 7.4 to 60 nm; (d) values obtained for  
134 hydrodynamic size, zeta potential and TEM.

### 135 2. Optimisation of nanoparticle concentrations for experiments

136 The lowest nTiO<sub>2</sub> concentration (5 µg/ml) was selected by normalising the number of  
137 nanoparticles to the surface area of the experimental organisms (Table S1). A ~3:1  
138 ratio of the total number of nanoparticles (calculation 1) to the number of particles that  
139 cover the cell surface (calculation 2) was used in the present study. A three-fold higher  
140 particle number was used to normalise changes in concentration during the uptake of  
141 nanoparticles by cells, which cannot be controlled for in this system. Furthermore, the

142 highest concentration (100  $\mu\text{g/ml}$ ) was selected according to a previous study,  
143 showing that nTiO<sub>2</sub> affects trophic transfer in the ciliated protozoan *Tetrahymena*  
144 *thermophile*.<sup>3</sup>

145 **Calculation 1:** Given concentrations of nTiO<sub>2</sub> were calculated as described by *Mielke*  
146 *et al.* (2011).<sup>3</sup>

147 The average size of heterogeneously distributed nTiO<sub>2</sub> was 50 nm or 5.0  
148  $\times 10^{-6}$  cm. If each particle is considered to be spherical, then the volume per particle  
149 is

150 Volume of nTiO<sub>2</sub> =  $\frac{4}{3} \times 3.14 \times [(5.0 \times 10^{-6} / 2)^3] = 6.5 \times 10^{-17}$

151 Density of TiO<sub>2</sub> = 3.97 g/cm<sup>3</sup>

152 Therefore, the mass of one nTiO<sub>2</sub> particle =  $(3.97 \text{ g/cm}^3) \times (6.5 \times 10^{-17}) = 2.5 \times 10^{-16} \text{ g}$

153 and the number of TiO<sub>2</sub> particles in a 5- $\mu\text{g}$  mass will be approximately

154  $1 \text{ particle} / 2.5 \times 10^{-16} \text{ g} \times (5 \mu\text{g}) \times 1 \text{ g} / 10^6 \mu\text{g} = 2 \times 10^{10}$

155 Surface area of the circular NPs =  $\pi \times (0.05/2)^2 = 0.0019 \mu\text{m}^2$

156 **Calculation 2:** To determine the numbers of nTiO<sub>2</sub> particles that can cover the  
157 surfaces of *E. coli* and *Paramecium*, the surface areas of both organisms were  
158 calculated.

159 ***E. coli:*** *E. coli* size was measured from SEM images (Figure S8a): 3-5  $\mu\text{m}$  in length,  
160  $\sim 0.7 \mu\text{m}$  in width.

161 Considering the cylindrical geometry of *E. coli*, the surface area is calculated as  
162 follows:

163  $\{2 \times [3.14 \times (0.7/2)^2]\} + [2 \times 3.14 \times 3 \times (0.7/2)] = 3.077 \mu\text{m}^2,$

164 Therefore, the number of nTiO<sub>2</sub> that can cover one *E. coli* = 3.077/ 0.0019 = 2564  
 165 particles

166 Similarly, the number of nTiO<sub>2</sub> that can cover 10<sup>6</sup> *E. coli* = 0.16 × 10<sup>10</sup> particles

167 ***Paramecium caudatum***: *Paramecium* size ranged from 120-170 μm in length and  
 168 ~20 μm in width as observed in SEM images (Figure S7b), Similarly, *Paramecium* cells  
 169 of this size (170 μm length and ~20 μm width) have been reported by *Kuroda et al.*  
 170 (1989).<sup>4</sup>

171 Considering the cylindrical geometry of the *Paramecium* cells<sup>4</sup>, the surface area is =  
 172  $\{2 \times [3.14 \times (20/2)^2]\} + [2 \times 3.14 \times 170 \times (20/2)] = 11304 \mu\text{m}^2$

173 Therefore, the number of nTiO<sub>2</sub> that can cover one *Paramecium* = 11304 / 0.0019 =  
 174 0.6 × 10<sup>7</sup> particles

175 Similarly, the number of nTiO<sub>2</sub> that can cover 800 cells = 800 × 0.6 × 10<sup>7</sup> particles =

176  $4.8 \times 10^9 = 0.48 \times 10^{10}$

177 **Table S1:** Calculation of the numbers of nanoparticles that could cover organismal  
 178 surfaces during the experiment.

| Organism               | Surface area          | Initial number cells/ml | Number of nTiO <sub>2</sub> that can cover the organismal surface |
|------------------------|-----------------------|-------------------------|-------------------------------------------------------------------|
| <i>E. coli</i>         | 3.077 μm <sup>2</sup> | 10 <sup>6</sup>         | 0.16 × 10 <sup>10</sup>                                           |
| <i>Paramecium (Pm)</i> | 11304 μm <sup>2</sup> | 800                     | 0.48 × 10 <sup>10</sup>                                           |
| <i>Pm + E. coli</i>    | -                     | -                       | 0.64 × 10 <sup>10</sup>                                           |

179



180 **Table S2:** Hydrodynamic diameters (d-nm) of *E. coli* and *Paramecium* cells in the  
 181 microcosm.

| Sample Name       | 1 h        | 24 h       |
|-------------------|------------|------------|
| <b>Ec-UZ</b>      | 4933 ± 791 | 2525 ± 244 |
| <b>Ec-MZ</b>      | 5350 ± 766 | 4514 ± 723 |
| <b>Ec-LZ</b>      | 2787 ± 185 | 3352 ± 49  |
| <b>Pm-UZ</b>      | ND         | ND         |
| <b>Pm-MZ</b>      | ND         | ND         |
| <b>Pm-LZ</b>      | ND         | ND         |
| <b>Ec + Pm-UZ</b> | 2487 ± 134 | 1631 ± 38  |
| <b>Ec + Pm-MZ</b> | 2607 ± 183 | 3370 ± 52  |
| <b>Ec + Pm-LZ</b> | 1794 ± 51  | 1493 ± 94  |

182

183 \*Ec, *E. coli*, Pm, *Paramecium*, ND, not detected

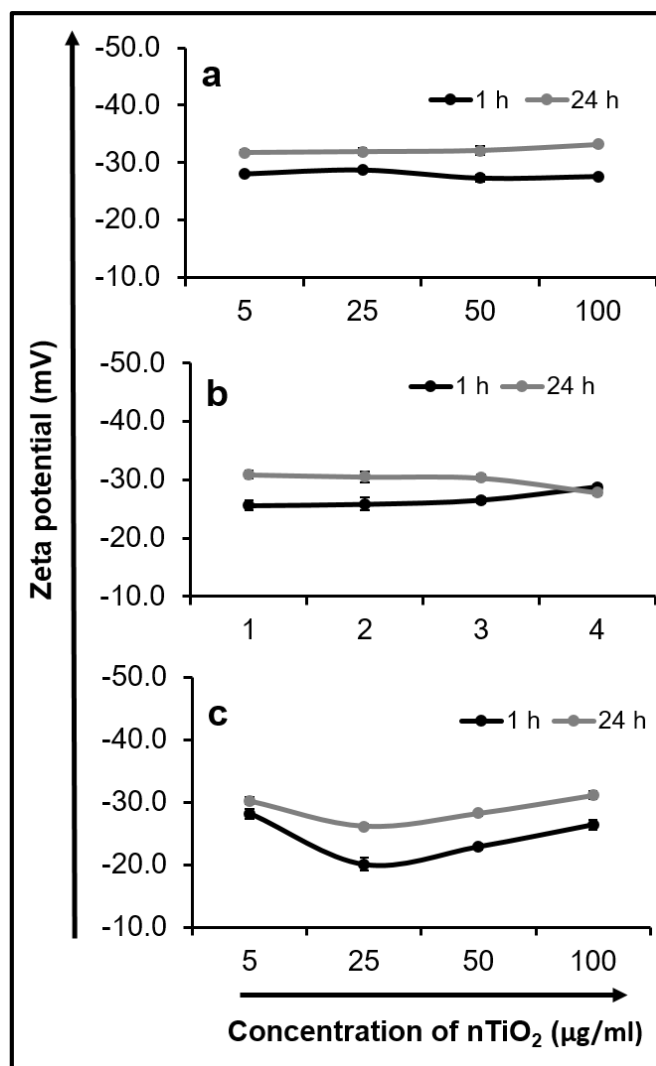

184

185 **Figure S3:** Zeta potential of individual nTiO<sub>2</sub> suspensions in Dryl's buffer at 1 and 24  
 186 h. (a) Upper zone, (b) middle zone and (c) lower zone.

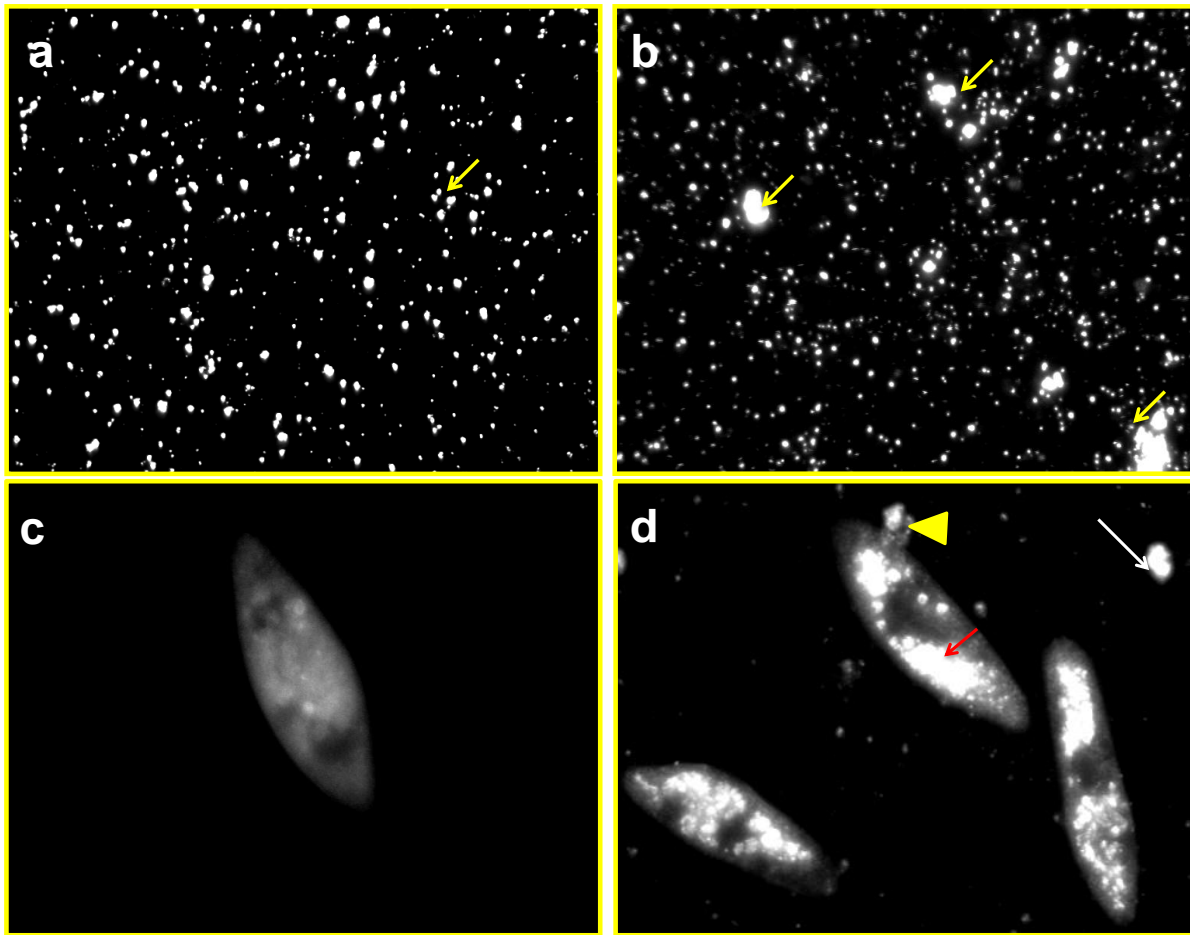

187

188 **Figure S4:** Hetero-agglomeration and intracellular interactions of nTiO<sub>2</sub> in an aquatic  
 189 microcosm. Dark field microscopy images; (a-b) dispersion of individual and *E. coli* co-  
 190 incubated nTiO<sub>2</sub> agglomerates in Dryl's buffer after 1 h. The yellow arrows indicate  
 191 nTiO<sub>2</sub> agglomerates. (c-d) *Paramecium* cells with or without nTiO<sub>2</sub> incubation after 1  
 192 h. nTiO<sub>2</sub> agglomerates outside the *Paramecium* cells are marked by white arrows and  
 193 inside by red arrows. Egestion of nTiO<sub>2</sub> from *Paramecium* is indicated with a yellow  
 194 triangle.

195 (All dark field images were captured at 200x magnification)

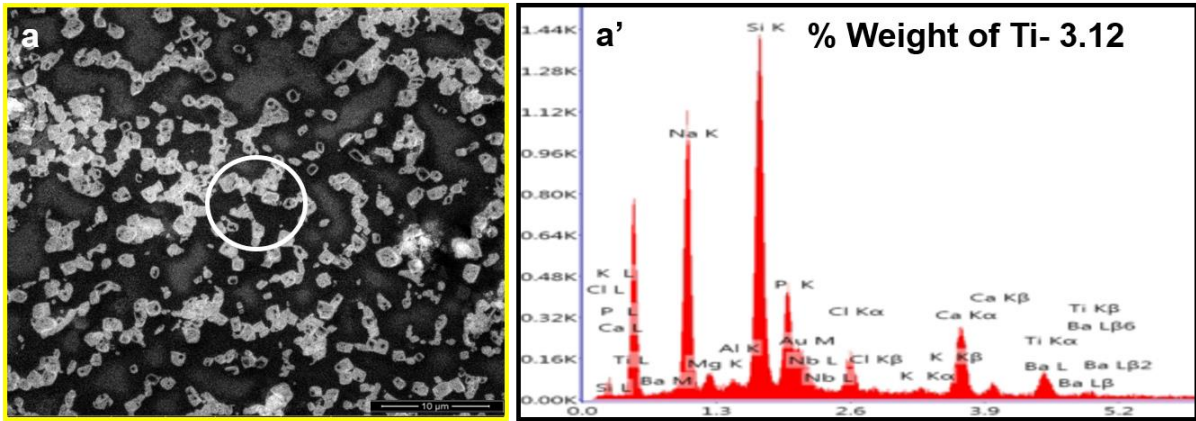

196

197 **Figure S5:** SEM-EDS analysis of nTiO<sub>2</sub> in the absence of *E. coli* and *Paramecium* at  
 198 1 h. (a) SEM image, (a') EDS spectrum.

199 White circle shows the region of interest for EDS analysis.

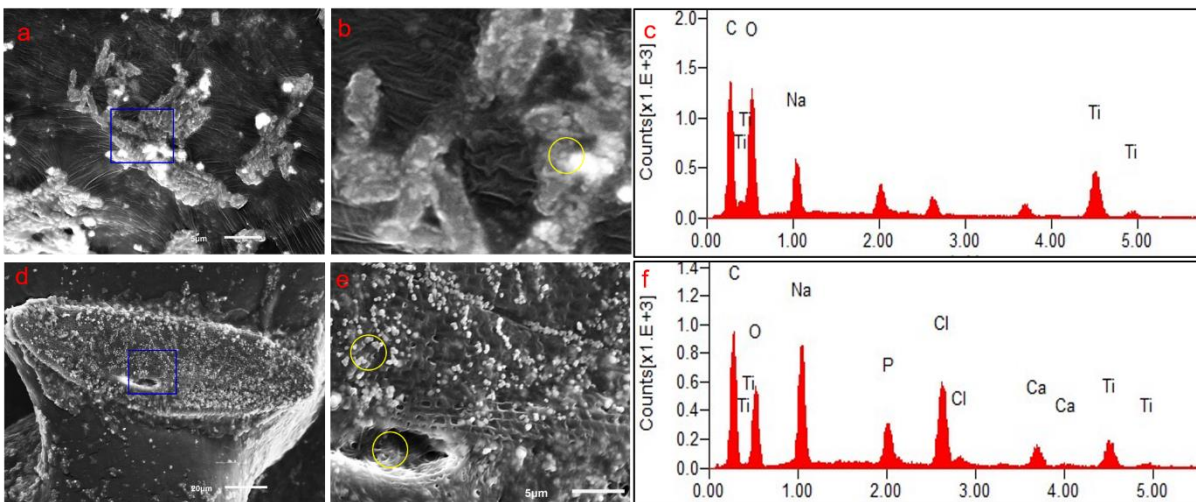

200

201 **Figure S6:** Adsorption and hetero-agglomeration of nTiO<sub>2</sub> in an aquatic microcosm.  
 202 SEM images with corresponding EDS spectra after 1 h of incubation with *E. coli* and  
 203 *Paramecium*. (a-c) nTiO<sub>2</sub> with *E. coli*, (d-f) nTiO<sub>2</sub> with *Paramecium* with *E. coli*.

204 The yellow circles in the image depict the region of interest for EDS analysis and  
 205 indicate the interfacial interactions of nTiO<sub>2</sub> with *E. coli* and *Paramecium*.

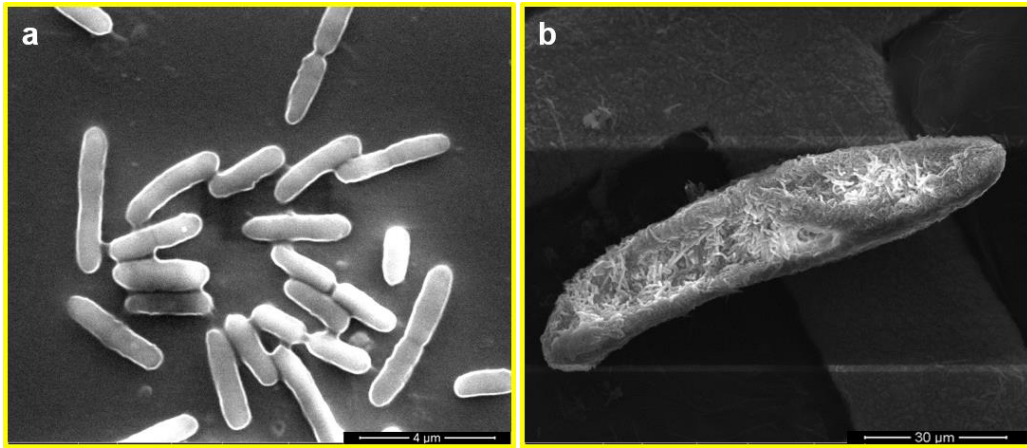

206

207 **Figure S7** Scanning electron microscopy images. (a) *E. coli* and (b) *Paramecium*. *E.*  
 208 *coli* size: 3-5 μm in length, ~0.7 μm in width; *Paramecium*: ~110-170 μm in length, ~20  
 209 μm in width.

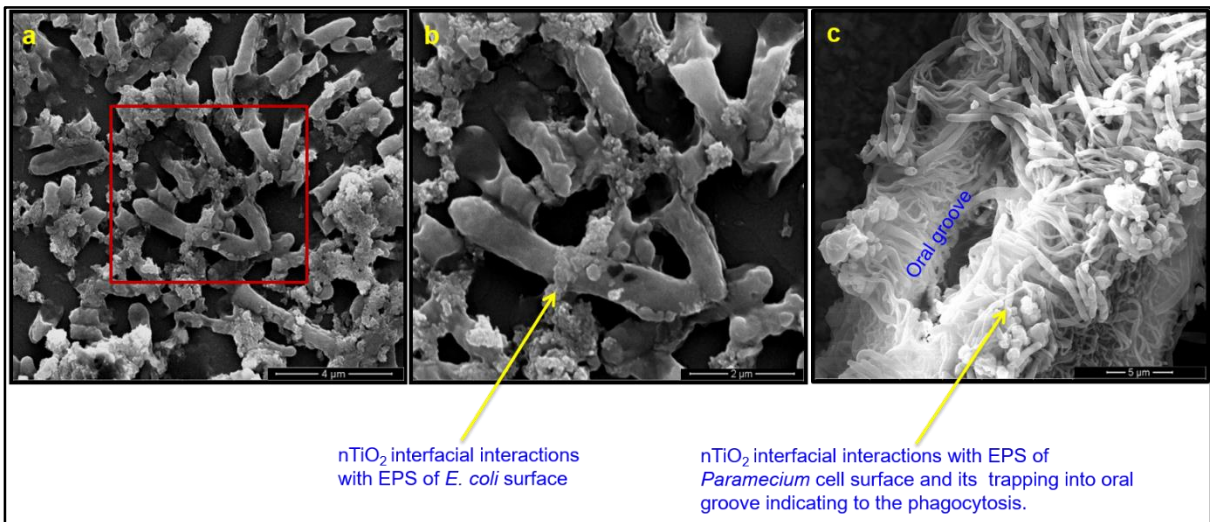

210

211 **Figure S8:** Adsorption of nTiO<sub>2</sub> onto the cell surface of *E. coli* (a) and *Paramecium*  
 212 (c). The higher magnification image (b) corresponds to the region of interest shown in  
 213 the red zone in image (a), indicating the interfacial interactions of nTiO<sub>2</sub> with *E. coli*.

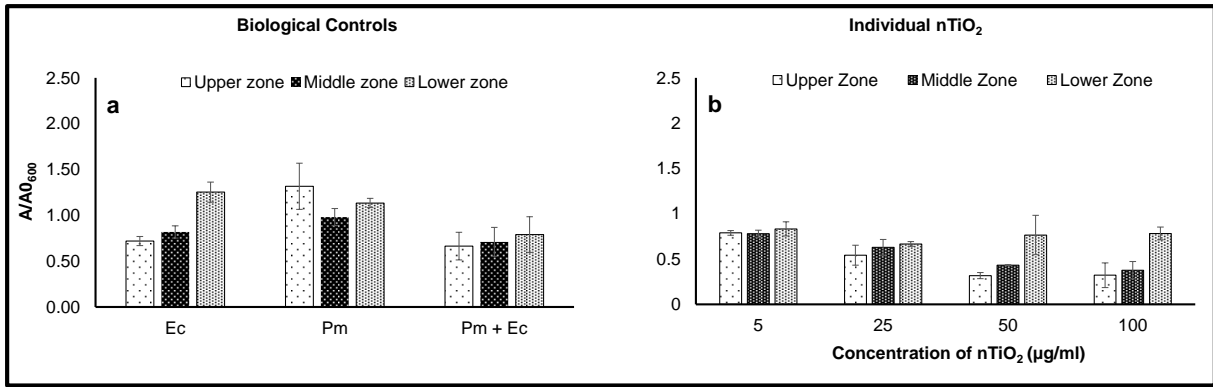

214

215 **Figure S9:** Individual sedimentation of the microorganisms (*E. coli* and *Paramecium*)  
 216 and nTiO<sub>2</sub> in the established microcosm. The ratios of initial and final absorbance in  
 217 the upper, middle and lower zones of the microcosm are shown; (a) individual  
 218 organisms and combinations; (b) nTiO<sub>2</sub>.

219 \*Ec, *E. coli*, Pm, *Paramecium*

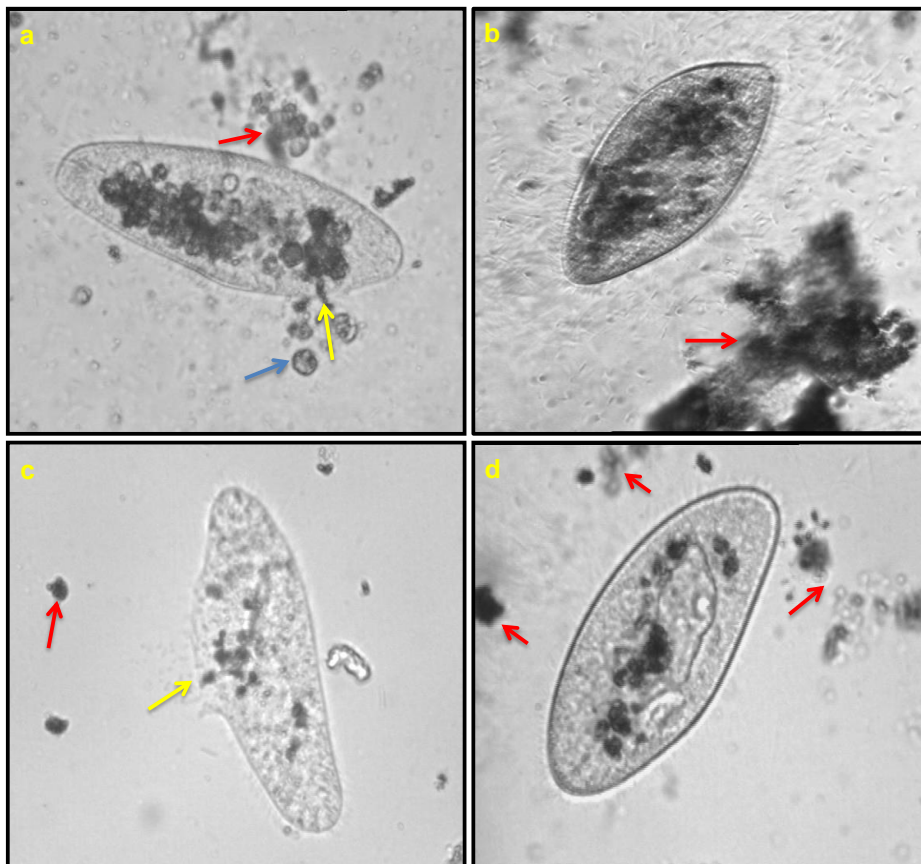

220

221 **Figure S10:** Bright field microscopy observations of nTiO<sub>2</sub> egestion and  
 222 agglomeration. (a, c) Egestion of nTiO<sub>2</sub>-loaded vesicles in the presence or absence of

223 *E. coli*. **(b, d)** Agglomeration of nTiO<sub>2</sub> in exposure medium containing both  
224 *Paramecium* and *E. coli* and *Paramecium* alone.

225 Arrows: red, nTiO<sub>2</sub> agglomerates; yellow, egestion of nTiO<sub>2</sub>-loaded vesicles, blue,  
226 egestion of *E. coli* and nTiO<sub>2</sub>-loaded vesicles.

### 227 **3. Adsorption of nTiO<sub>2</sub> onto early-stage zebrafish (*Danio rerio*) embryos:**

228 Zebrafish were bred in a tanks, and the eggs were collected in a petri dish and  
229 maintained in a BOD incubator (Panasonic, Japan) at 28 °C in egg water (60 mg/L sea  
230 salt). After 4 h, the eggs were distributed in 6-well microtiter plates (Corning, USA)  
231 containing E3 medium (5 mM NaCl, 0.17 mM KCl, 0.33 mM CaCl<sub>2</sub> and 0.33 mM  
232 MgSO<sub>4</sub>, pH 7.0-7.2). The eggs were then exposed to different concentrations of nTiO<sub>2</sub>  
233 (5, 50 and 100 µg/ml) and observed continuously under a stereo-zoom microscope  
234 (Medline, India). The images showed the extensive adsorption of nTiO<sub>2</sub> onto the  
235 chorion surface. The adsorption of nTiO<sub>2</sub> was further confirmed by SEM coupled with  
236 EDS.

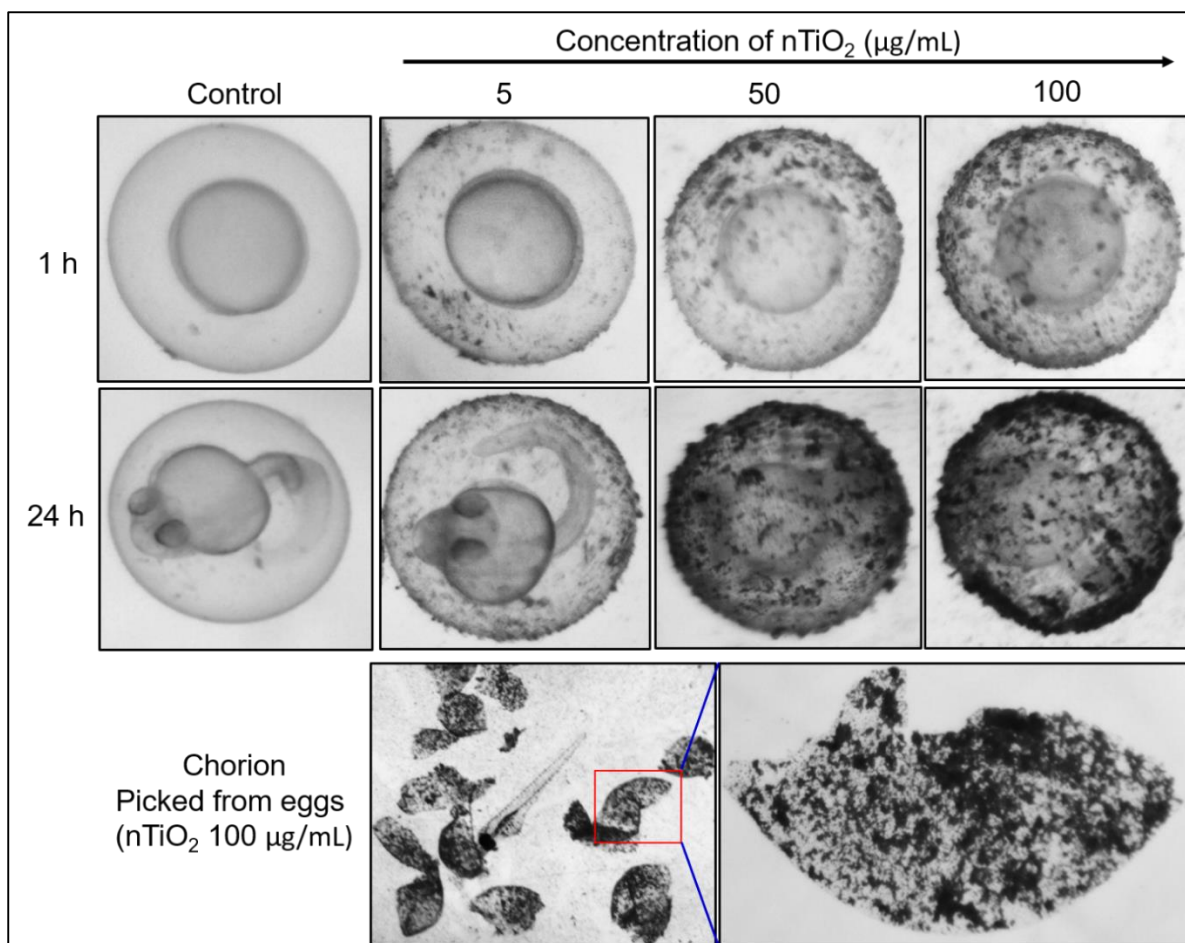

237

238 **Figure S11:** Adsorption of nTiO<sub>2</sub> at different concentrations onto the chorions of  
 239 zebrafish embryos at 1 and 24 h.



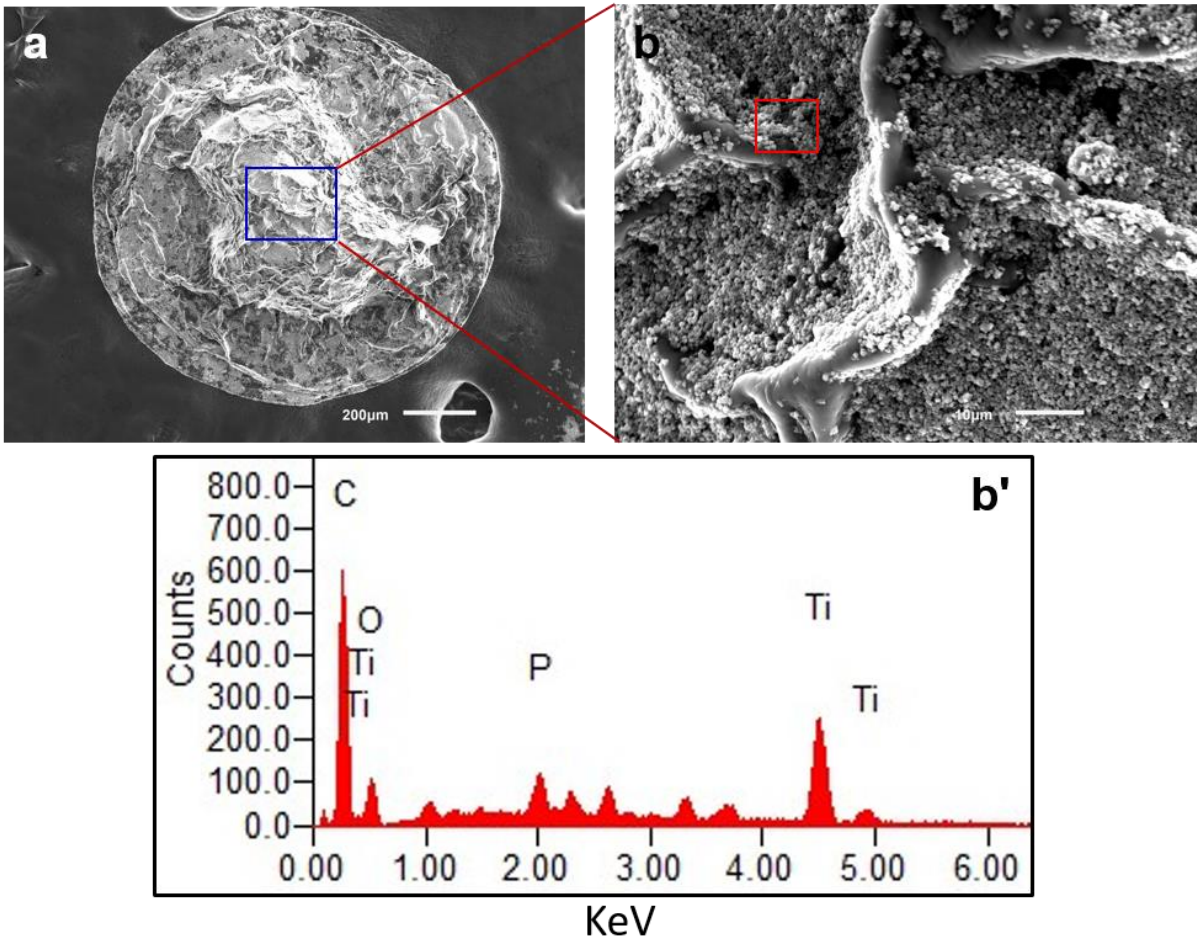

240

241 **Figure S12:** Adsorption of nTiO<sub>2</sub> onto the chorions of zebrafish embryos at 24 h. (a)  
 242 SEM image of nTiO<sub>2</sub>-exposed eggs, (b) high magnification view of the egg region  
 243 indicated by a blue circle, (b') EDS spectrum corresponds to image confirming nTiO<sub>2</sub>  
 244 adsorption on the chorion.

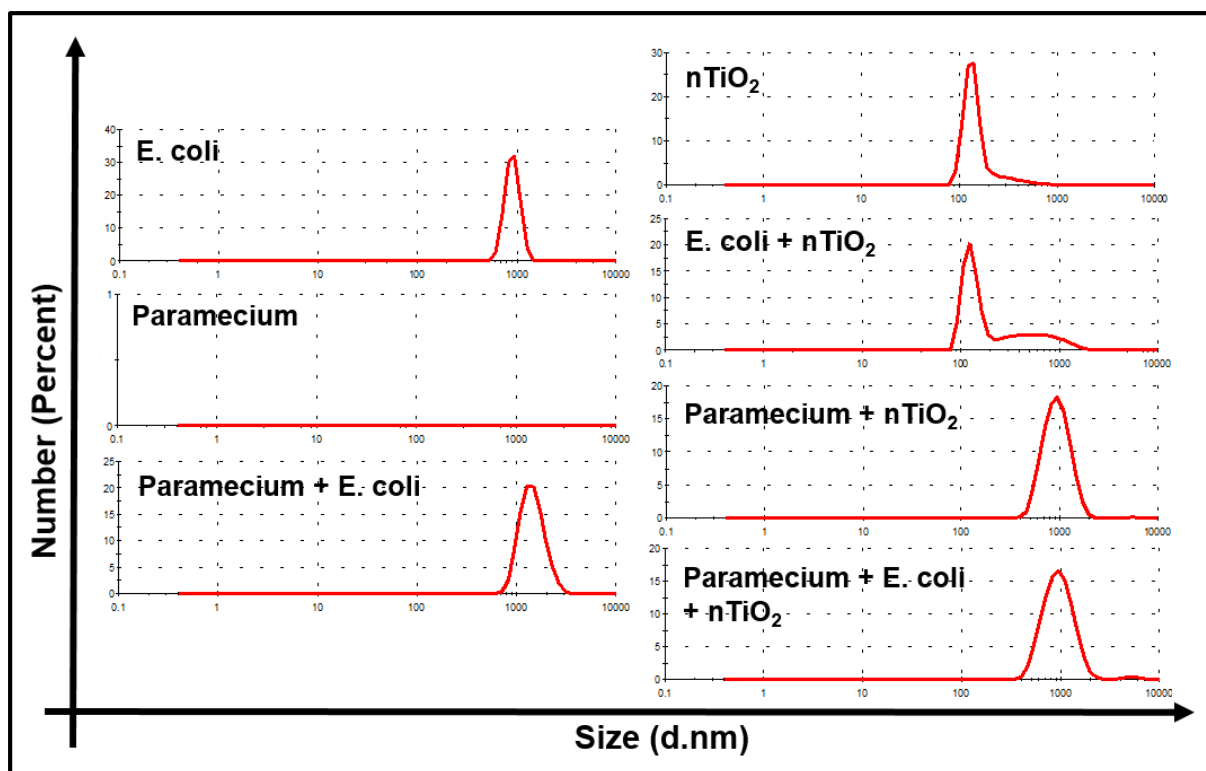

245

246 **Figure S13:** Modality of nTiO<sub>2</sub> size analysis by DLS in the presence of *E. coli* and  
 247 *Paramecium*.

248

249 **References**

- 250 1. Pernthaler, J., Predation on prokaryotes in the water column and its ecological  
 251 implications. *Nat Rev Microbiol* **3**, 537-46 (2005).
- 252 2. Mullen, M. D., Wolf, D. C., Ferris, F. G., Beveridge, T. J., Flemming, C. A., &  
 253 Bailey, G. W. Bacterial sorption of heavy metals. *Appl Environ Microbiol* **55**,  
 254 3143-9 (1989).
- 255 3. Mielke, R. E. et al. Differential growth of and nanoscale TiO<sub>2</sub> accumulation in  
 256 *Tetrahymena thermophila* by direct feeding versus trophic transfer from  
 257 *Pseudomonas aeruginosa*. *Appl Environ Microbiol* **79**, 5616-5624 (2013).
- 258 4. Kuroda, K. & Kamiya, N. Propulsive force of *Paramecium* as revealed by the  
 259 video centrifuge. *Experimental Cell Research* **184** 268-272 (1989).

260
